# Supplementary material for: Interleukin-1β Protects Neurons against Oxidant-Induced Injury via the Promotion of Astrocyte Glutathione Production
Source: MDPI journal article supplement (doi:10.3390/antiox7080100), 2018-07-25
Supplement: s1 [file s1]

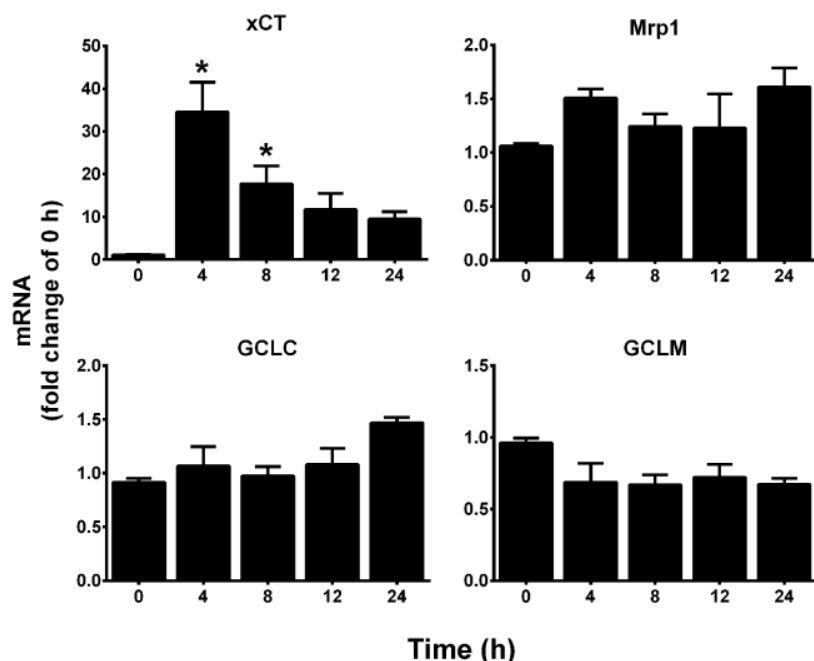

**Figure S2: Effect of IL-1 $\beta$  on molecules involved in GSH synthesis and export.** Purified astrocytes were treated with IL-1 $\beta$  (3 ng/mL) or vehicle (0 h) for the indicated duration and mRNA levels of the substrate specific light chain of system xc- (xCT), glutamate cysteine ligase catalytic subunit (GCLC) and modifier subunit (GCLM) as well as the GSH exporter (MRP1) were assessed via qPCR. Data are expressed as mean + SEM fold change in mRNA of genes of interest compared with untreated cells (0 h). An asterisk (\*) denotes values different from 0 h as assessed by one-way ANOVA (n=3-4). Significance was set at  $p < 0.05$ .

**Method for Figure S2:** RNA was isolated and first-strand cDNA synthesized as previously described (Jackman et al., 2010). qPCR was performed using mouse-specific primer pairs [Taqman Gene Expression Assays, Applied Biosystems: system xc<sup>-</sup> light chain (xCT) (Mm00442530\_m1), glutamate cysteine ligase catalytic subunit (GCLC) (Mm00802655\_m1) and modifier subunit (GCLM) (Mm00514996\_m1) and multidrug resistance protein 1 (MRP1/Abcc1) (Mm00456156\_m1) per manufacturer's instructions. Reactions were run in the Applied Biosystems Fast Real-Time PCR System and relative quantification performed using the comparative cycle threshold method ( $\Delta\Delta C_T$ ), where  $C_T$  values of the transcript of interest were normalized to  $\beta$ -actin  $C_T$  values from the same sample, then compared to a calibrator  $C_T$  value (untreated cells) to determine the relative fold increase in mRNA.  $\beta$ -actin  $C_T$  values were unaffected by IL-1 $\beta$  treatment.
